# Supplementary material for: Moisture-induced degradation and its mechanism of (Sr,Ca)AlSiN3:Eu2+, a red-color-converter for solid state lighting
Source: Royal Society of Chemistry journal article supplement (doi:10.1039/c4tc02824d), 2015-01-01
Supplement: c4tc02824d1.pdf [file c4tc02824d1.pdf]

## Moisture-induced degradation and its mechanism of (Sr,Ca)AlSiN<sub>3</sub>:Eu<sup>2+</sup>, a red-color-converter for solid state lighting

Jie Zhu<sup>a,b</sup>, Rong-Jun Xie<sup>a,c\*</sup>, Tianliang Zhou<sup>c</sup>, Yujin Cho<sup>d,e</sup>, Takayuki Suehiro<sup>a</sup>, Takashi Takeda<sup>a</sup>,  
Ming Lu<sup>b</sup>, Takashi Sekiguchi<sup>d,e</sup>, Naoto Hirosaki<sup>a</sup>

<sup>a</sup> Sialon Group, Sialon Unit, National Institute for Materials Science, Namiki 1-1, Tsukuba, Ibaraki 305-0044, Japan.

<sup>b</sup> School of Chemical Engineering, Nanjing University of Science and Technology, 200 Xiao Ling Wei, Nanjing, Jiangsu 210094, China.

<sup>c</sup> College of Materials, Xiamen University, Xiamen, Fujian 361005, China.

<sup>d</sup> Nano Device Characterization Group, National Institute for Materials Science, Namiki 1-1, Tsukuba, Japan.

<sup>e</sup> Graduate School of Pure and Applied Science, University of Tsukuba, Tenodai 1-1-1, Tsukuba, Ibaraki 305-8571, Japan.

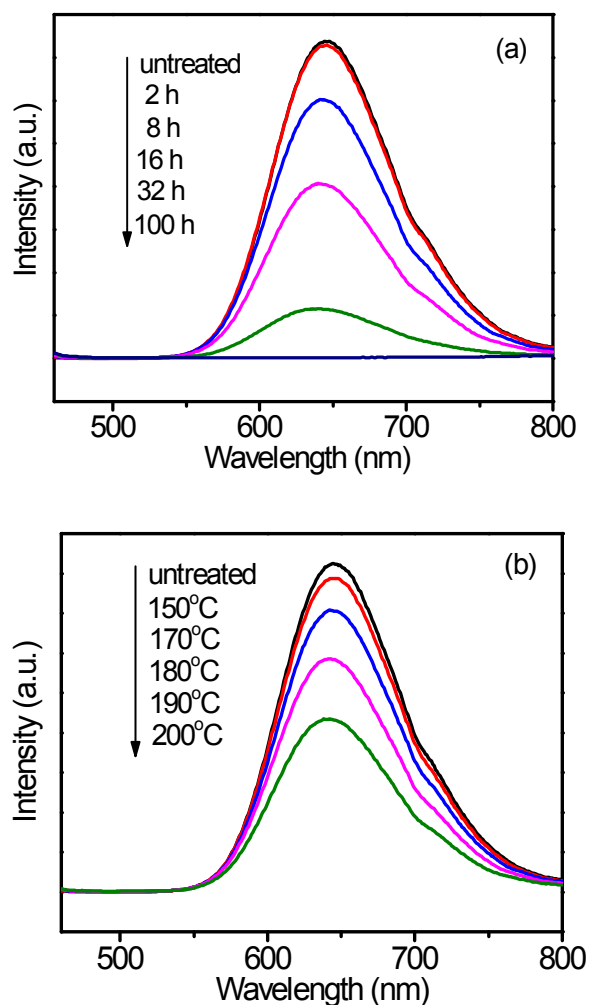

Figure S1 Emission spectra of SCASN treated in moisture (a) at 200°C for different time periods; (b) for 16 h at different temperature. Samples were excited at  $\lambda_{em} = 450$  nm

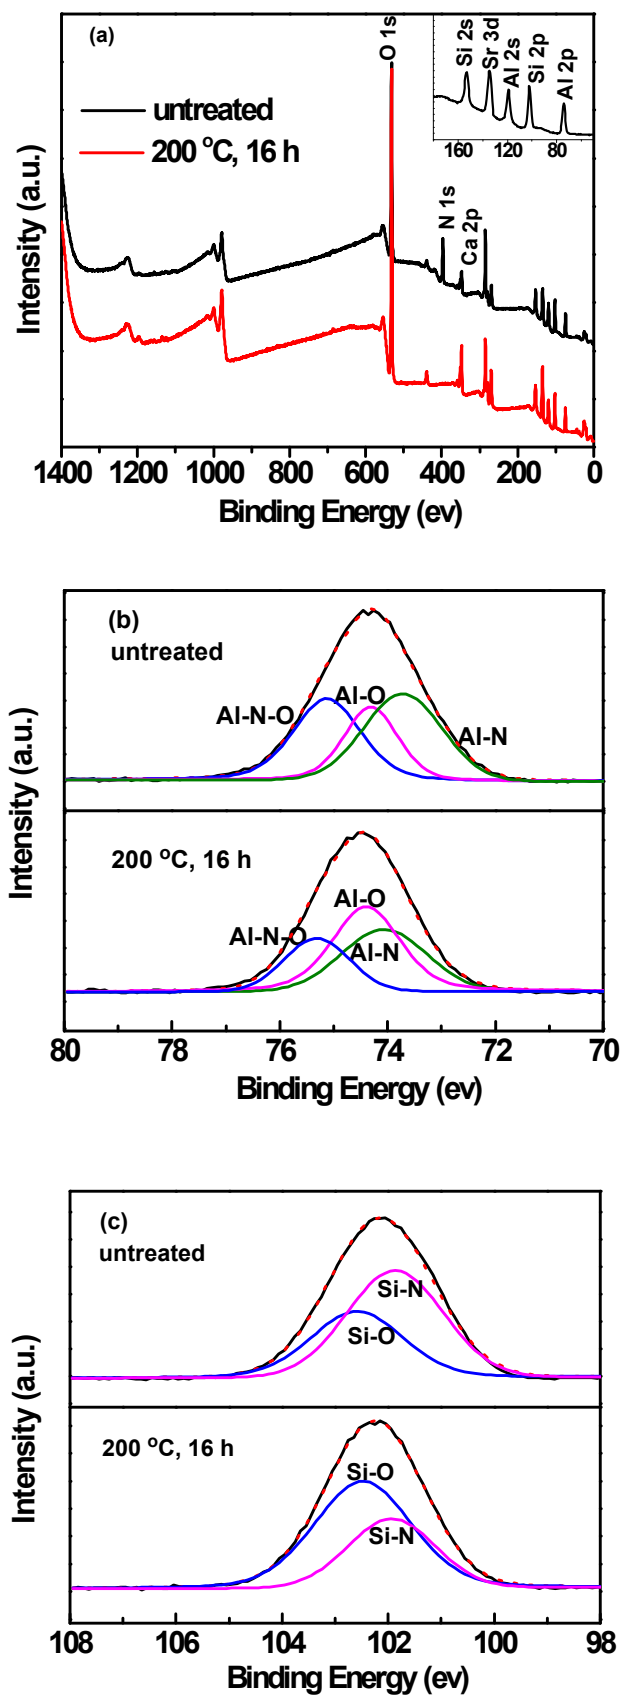

Figure S2 Wide scan spectra of SCASN before and after treatment (a) and XPS spectra of Al 2p (b), Si 2p (c) respectively.
